# Supplementary material
Source: PubMed Central journal article supplement (PMC5104677)
Supplement: NIHMS785247-supplement-Supp_Table_S2.pdf [file NIHMS785247-supplement-Supp_Table_S2.pdf]

**Supplemental Table 2. Selected characteristics of kidney transplant recipients by exit reason**

| Characteristics                         | Patients Who Exited Due to Death |                | Patients Who Exited Due to Graft Failure/Retransplant |                | Patients Who Exited Due to Loss to Follow-up by SRTR |                | Patients Who Exited Due to End of Cancer Registry Follow-up |                | P-value <sup>2</sup> |
|-----------------------------------------|----------------------------------|----------------|-------------------------------------------------------|----------------|------------------------------------------------------|----------------|-------------------------------------------------------------|----------------|----------------------|
|                                         | N                                | % <sup>1</sup> | N                                                     | % <sup>1</sup> | N                                                    | % <sup>1</sup> | N                                                           | % <sup>1</sup> |                      |
| <b>Overall</b>                          | 18,022                           | 100.0          | 28,777                                                | 100.0          | 12,664                                               | 100.0          | 56,062                                                      | 100.0          |                      |
| <b>Sex</b>                              |                                  |                |                                                       |                |                                                      |                |                                                             |                | <0.0001              |
| Male                                    | 11,480                           | 63.7           | 16,640                                                | 57.8           | 7,695                                                | 60.8           | 33,066                                                      | 59.0           |                      |
| Female                                  | 6,542                            | 36.3           | 12,137                                                | 42.2           | 4,969                                                | 39.2           | 22,996                                                      | 41.0           |                      |
| <b>Age at transplant, years</b>         |                                  |                |                                                       |                |                                                      |                |                                                             |                | <0.0001              |
| <30                                     | 802                              | 4.5            | 7,500                                                 | 26.1           | 3,002                                                | 23.7           | 8,366                                                       | 14.9           |                      |
| 30-<40                                  | 1,730                            | 9.6            | 6,237                                                 | 21.7           | 2,840                                                | 22.4           | 8,647                                                       | 15.4           |                      |
| 40-<50                                  | 3,464                            | 19.2           | 6,656                                                 | 23.1           | 3,030                                                | 23.9           | 12,551                                                      | 22.4           |                      |
| 50-<60                                  | 5,610                            | 31.1           | 5,211                                                 | 18.1           | 2,539                                                | 20.1           | 14,359                                                      | 25.6           |                      |
| 60+                                     | 6,416                            | 35.6           | 3,173                                                 | 11.0           | 1,253                                                | 9.9            | 12,139                                                      | 21.7           |                      |
| <b>Calendar year of transplant</b>      |                                  |                |                                                       |                |                                                      |                |                                                             |                | <0.0001              |
| <1995                                   | 5,398                            | 30.0           | 9,473                                                 | 32.9           | 2,311                                                | 18.3           | 2,431                                                       | 4.3            |                      |
| 1995-<2000                              | 6,075                            | 33.7           | 9,473                                                 | 32.9           | 3,731                                                | 29.5           | 6,876                                                       | 12.3           |                      |
| 2000-<2005                              | 4,639                            | 25.7           | 6,864                                                 | 23.9           | 4,518                                                | 35.7           | 16,211                                                      | 28.9           |                      |
| 2005+                                   | 1,910                            | 10.6           | 2,967                                                 | 10.3           | 2,104                                                | 16.6           | 30,544                                                      | 54.5           |                      |
| <b>Race</b>                             |                                  |                |                                                       |                |                                                      |                |                                                             |                | <0.0001              |
| White                                   | 10,825                           | 60.1           | 13,925                                                | 48.4           | 6,852                                                | 54.1           | 28,129                                                      | 50.2           |                      |
| Black                                   | 3,911                            | 21.7           | 9,004                                                 | 31.3           | 1,847                                                | 14.6           | 12,459                                                      | 22.2           |                      |
| Hispanic                                | 2,404                            | 13.3           | 4,394                                                 | 15.3           | 2,733                                                | 21.6           | 11,144                                                      | 19.9           |                      |
| Asian/Pacific Islander/Hawaiian         | 882                              | 4.9            | 1,454                                                 | 5.1            | 1,232                                                | 9.7            | 4,330                                                       | 7.7            |                      |
| <b>Dialysis prior to transplant</b>     |                                  |                |                                                       |                |                                                      |                |                                                             |                | <0.0001              |
| No                                      | 770                              | 4.3            | 2,193                                                 | 7.6            | 1,330                                                | 10.5           | 7,971                                                       | 14.2           |                      |
| Yes                                     | 17,000                           | 94.3           | 26,511                                                | 92.1           | 11,029                                               | 87.1           | 47,637                                                      | 85.0           |                      |
| Missing/Unknown                         | 252                              | 1.4            | 73                                                    | 0.25           | 305                                                  | 2.4            | 454                                                         | 0.8            |                      |
| <b>Indication for transplant</b>        |                                  |                |                                                       |                |                                                      |                |                                                             |                | <0.0001              |
| Glomerular Diseases                     | 3,332                            | 18.5           | 9,047                                                 | 31.4           | 4,335                                                | 34.2           | 16,340                                                      | 29.2           |                      |
| Diabetes mellitus                       | 6,871                            | 38.1           | 6,060                                                 | 21.1           | 1,771                                                | 14.0           | 11,569                                                      | 20.6           |                      |
| Hypertensive Nephrosclerosis            | 3,161                            | 17.5           | 4,922                                                 | 17.1           | 1,800                                                | 14.2           | 10,492                                                      | 18.7           |                      |
| Polycystic Kidney Disease               | 1,416                            | 7.9            | 1,747                                                 | 6.1            | 1,349                                                | 10.7           | 6,114                                                       | 10.9           |                      |
| Tubular/Interstitial Diseases           | 742                              | 4.1            | 1,651                                                 | 5.7            | 797                                                  | 6.3            | 2,784                                                       | 5.0            |                      |
| Vascular Diseases                       | 748                              | 4.2            | 1,261                                                 | 4.4            | 440                                                  | 3.5            | 2,019                                                       | 3.6            |                      |
| Congenital/Familial/Metabolic Disorders | 199                              | 1.1            | 1,012                                                 | 3.5            | 545                                                  | 4.3            | 1,911                                                       | 3.4            |                      |
| Other/Unknown Conditions                | 1,553                            | 8.6            | 3,077                                                 | 10.7           | 1,627                                                | 12.9           | 4,833                                                       | 8.6            |                      |
| <b>Donor type</b>                       |                                  |                |                                                       |                |                                                      |                |                                                             |                | <0.0001              |
| Living                                  | 4,385                            | 24.3           | 8,873                                                 | 30.8           | 5,762                                                | 45.5           | 23,703                                                      | 42.3           |                      |
| Deceased                                | 13,637                           | 75.7           | 19,904                                                | 69.2           | 6,902                                                | 54.5           | 32,359                                                      | 57.7           |                      |

Abbreviations: N- number; std- standard deviation

<sup>1</sup> Frequencies may not sum to 100% due to rounding.<sup>2</sup> P-values from chi-square test.<sup>3</sup> Interquartile Range
